# Supplementary material
Source: publisher figshare collection journal article supplement (https://acs.figshare.com/ndownloader/files/4477810)

## Supporting Information

### Trigochinins A–C: Three New Daphnane-type Diterpenoids from *Trigonostemon chinensis*

Hua-Dong Chen,<sup>†</sup> Sheng-Ping Yang,<sup>†</sup> Xiu-Feng He, Jing Ai, Zhen-Kai Liu,

Hong-Bing Liu, Mei-Yu Geng, and Jian-Min Yue\*

*State Key Laboratory of Drug Research, Shanghai Institute of Materia Medica, Shanghai  
Institutes for Biological Sciences, Chinese Academy of Sciences, 555 Zu Chong Zhi Road,  
Zhangjiang Hi-Tech Park, Shanghai, 201203, P. R. China Fax: +86-21-50806718*

*E-mail: [jmyue@mail.shcnc.ac.cn](mailto:jmyue@mail.shcnc.ac.cn)*

- S1. <sup>1</sup>H NMR Data of compounds **1–3** (in CDCl<sub>3</sub>)
- S2. <sup>13</sup>C NMR Data of compounds **1–3** (in CDCl<sub>3</sub>)
- S3. Selected HMBC and ROESY correlations of compounds **2** and **3**
- S4. Experimental Section

#### For compound **1**

- S5. <sup>1</sup>H NMR spectrum of trigochinin A (**1**)
- S6. <sup>13</sup>C NMR spectrum of trigochinin A (**1**)
- S7. EIMS of trigochinin A (**1**)
- S8. HSQC spectrum of trigochinin A (**1**)
- S9. HMBC Spectrum of trigochinin A (**1**)
- S10. ROESY spectrum of trigochinin A (**1**)

#### For compound **2**

- S11. <sup>1</sup>H NMR spectrum of trigochinin B (**2**)
- S12. <sup>13</sup>C NMR spectrum of trigochinin B (**2**)
- S13. EIMS of trigochinin B (**2**)

---

<sup>†</sup> These authors contributed equally.

- S14. HSQC spectrum of trigochinin B (2)  
S15. HMBC spectrum of trigochinin B (2)  
S16. ROESY spectrum of trigochinin B (2)

**For compound 3**

- S17.  $^1\text{H}$  NMR spectrum of trigochinin C (3)  
S18.  $^{13}\text{C}$  NMR spectrum of trigochinin C (3)  
S19. EIMS of trigochinin C (3)  
S20. HSQC spectrum of trigochinin C (3)  
S21. HMBC spectrum of trigochinin C (3)  
S22. ROESY spectrum of trigochinin C (3)

## S1. <sup>1</sup>H NMR Data of compounds 1–3 (in CDCl<sub>3</sub>)

**Table 1.** <sup>1</sup>H NMR Data of Compounds 1–3 (in CDCl<sub>3</sub>)<sup>[a]</sup>

| no.    | 1                    | 2                    | 3                    |
|--------|----------------------|----------------------|----------------------|
| 1      | 1.14 (m)<br>1.94 (m) | 1.29 (m)<br>2.01 (m) | 1.42 (m)<br>2.16 (m) |
| 2      | 2.20 (m)             | 2.45 (m)             | 2.43 (m)             |
| 3      | 4.18 (t, 10.2)       | 5.22 (d, 10.4)       | 5.12 (d, 10.1)       |
| 5      | 6.30 (s)             | 6.29 (s)             | 6.15 (s)             |
| 7      | 5.70 (d, 4.3)        | 5.70 (d, 4.3)        | 5.73 (d, 5.6)        |
| 8      | 2.29, (dd, 4.3, 1.4) | 2.96 (dd, 4.3, 1.4)  | 2.74 (dd, 5.6, 0.9)  |
| 10     | 2.14 (m)             | 2.20 (m)             | 2.24 (dd, 13.4, 5.4) |
| 11     | 2.23 (m)             | 2.23 (m)             | 1.82 (m)             |
| 12     | 6.37 (dd, 4.2, 1.4)  | 6.37 (dd, 4.3, 1.4)  | 4.16 (brs)           |
| 14     | 6.09 (brs)           | 6.10 (brs)           | 4.57 (brs)           |
| 16     | 5.49 (s)<br>5.44 (s) | 5.49 (s)<br>5.43 (s) | 5.24 (s)<br>4.97 (s) |
| 17     | 1.95 (s)             | 1.96 (s)             | 1.86 (s)             |
| 18     | 1.17 (d, 6.9)        | 1.18 (d, 6.8)        | 1.45 (d, 6.6)        |
| 19     | 0.95 (d, 7.2)        | 0.85 (d, 7.1)        | 0.84 (d, 7.1)        |
| 20     | 1.33 (s)             | 1.39 (s)             | 1.43 (s)             |
| 3'     | 8.12 (dd, 8.4, 1.5)  | 7.97 (dd, 8.3, 1.3)  | 7.79 (m)             |
| 4'     | 7.45 (m)             | 7.45 (m)             | 7.41 (m)             |
| 5'     | 7.90 (m)             | 7.59 (m)             | 7.38, m              |
| 6'     | 7.45 (m)             | 7.45 (m)             | 7.41 (m)             |
| 7'     | 8.12 (dd, 8.4, 1.5)  | 7.97 (dd, 8.3, 1.3)  | 7.79 (m)             |
| 3''    | 7.89 (dd, 8.3, 1.4)  | 7.89 (dd, 8.2, 1.3)  | 8.00 (dd, 8.4, 1.4)  |
| 4''    | 7.40 (m)             | 7.41 (m)             | 7.46 (m)             |
| 5''    | 7.88 (m)             | 7.54 (m)             | 7.59 (m)             |
| 6''    | 7.40 (m)             | 7.41 (m)             | 7.46 (m)             |
| 7''    | 7.89(dd, 8.3, 1.4)   | 7.89 (dd, 8.2, 1.3)  | 8.00 (dd, 8.4, 1.4)  |
| HO-3   | 2.79 (d, 10.2)       |                      |                      |
| HO-9   | 3.61 (s)             | 3.52 (s)             |                      |
| HO-13  |                      |                      | 3.81 (brs)           |
| 3-OAc  |                      | 2.04 (s)             | 1.98 (s)*            |
| 5-OAc  |                      |                      |                      |
| 7-OAc  | 2.15 (s)             | 2.14 (s)             | 1.97 (s)*            |
| 12-OAc | 1.94 (s)             | 1.94 (s)             |                      |
| 14-OAc | 2.14 (s)             | 2.13 (s)             |                      |

[a] Data were recorded at 400 MHz, chemical shifts are in ppm, and the coupling constants *J* are in Hz (in parentheses); \*it may be exchangeable in the same vertical column.

## S2. <sup>13</sup>C NMR Data of compounds 1–3 (in CDCl<sub>3</sub>)

**Table 2.** <sup>13</sup>C NMR Data of Compounds 1–3 (in CDCl<sub>3</sub>)<sup>[a]</sup>.

| no. | 1     | 2     | 3     | no.    | 1     | 2      | 3     |
|-----|-------|-------|-------|--------|-------|--------|-------|
| 1   | 34.9  | 34.5  | 32.7  | 1'     | 165.9 | 165.8  | 108.8 |
| 2   | 32.8  | 31.0  | 30.4  | 2'     | 130.0 | 129.9  | 138.1 |
| 3   | 72.1  | 73.8  | 74.0  | 3'     | 129.9 | 129.5  | 125.3 |
| 4   | 92.8  | 91.0  | 90.7  | 4'     | 128.5 | 128.5  | 128.0 |
| 5   | 73.6  | 73.8  | 73.7  | 5'     | 130.0 | 133.4  | 129.5 |
| 6   | 84.8  | 83.9  | 83.4  | 6'     | 128.5 | 128.5  | 128.0 |
| 7   | 78.9  | 79.3  | 77.0  | 7'     | 129.9 | 129.5  | 125.3 |
| 8   | 39.3  | 39.2  | 39.1  | 1''    | 164.0 | 164.0  | 165.5 |
| 9   | 76.7  | 76.8  | 77.0  | 2''    | 129.6 | 129.5  | 129.6 |
| 10  | 49.6  | 49.6  | 48.1  | 3''    | 129.5 | 129.5  | 129.5 |
| 11  | 40.3  | 40.3  | 35.0  | 4''    | 128.5 | 128.5  | 128.5 |
| 12  | 72.7  | 72.6  | 79.6  | 5''    | 133.2 | 133.2  | 133.3 |
| 13  | 81.9  | 81.8  | 69.4  | 6''    | 128.5 | 128.5  | 128.5 |
| 14  | 75.3  | 75.2  | 76.2  | 7''    | 129.5 | 133.2  | 129.5 |
| 15  | 139.3 | 139.2 | 141.7 | 3-OAc  |       | 170.3  | 170.3 |
|     |       |       |       |        |       | 20.6   | 20.6* |
| 16  | 119.7 | 119.7 | 115.9 | 7-OAc  | 170.1 | 170.1, | 171.6 |
|     |       |       |       |        | 21.3  | 21.3   | 21.3* |
| 17  | 20.1  | 20.1  | 18.2  | 12-OAc | 169.3 | 169.3  |       |
|     |       |       |       |        | 20.8  | 20.8   |       |
| 18  | 11.5  | 11.6  | 14.6  | 14-OAc | 169.0 | 169.0  |       |
|     |       |       |       |        | 21.5  | 21.5   |       |
| 19  | 15.5  | 15.8  | 15.9  |        |       |        |       |
| 20  | 19.7  | 19.8  | 19.1  |        |       |        |       |

[a] Data were recorded at 100 MHz, chemical shifts ( $\delta$ ) are in ppm; the full assignments were achieved by 2D NMR spectra; \*it may be exchangeable in the same vertical column.

### S3. Selected HMBC and ROESY correlations of compounds 2 and 3

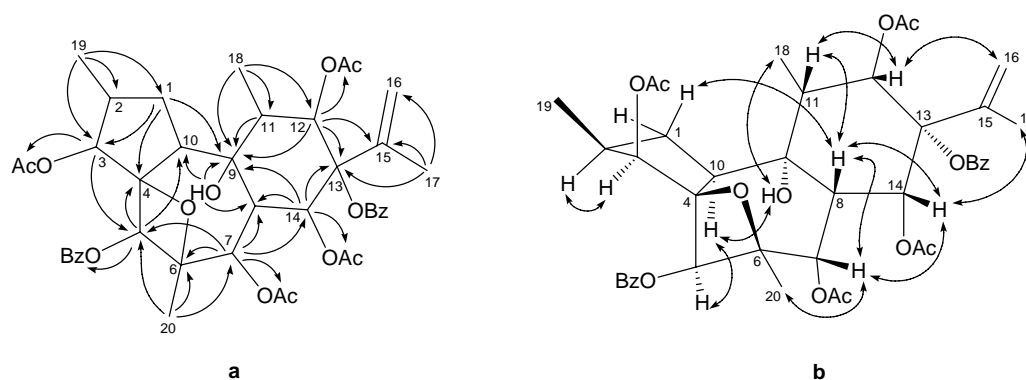

**Figure 1.** (a) Selected HMBC (H→C), and (b) ROESY (H↔H) correlations of **2**.

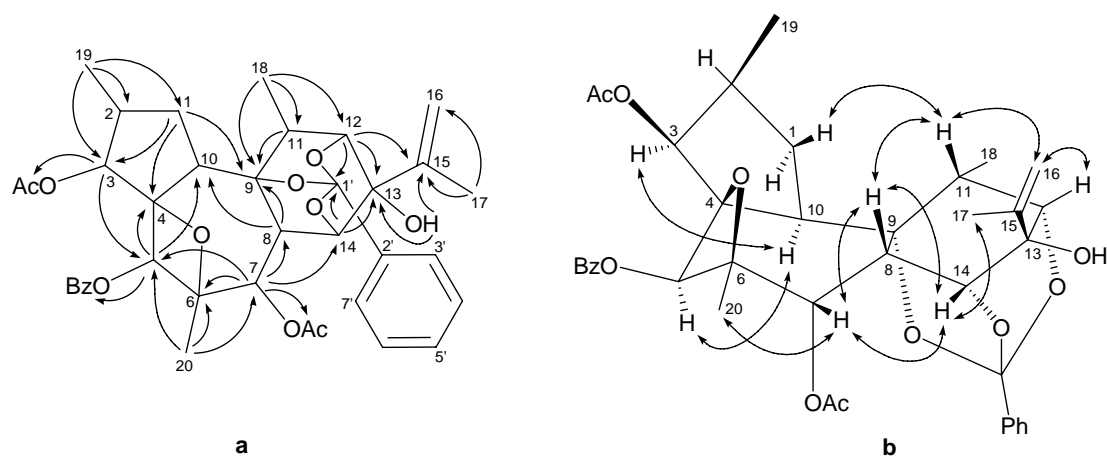

**Figure 2.** (a) Selected HMBC (H→C), and (b) ROESY (H↔H) correlations of **3**.

## **S4. Experimental Section**

### **General Experimental Procedures**

Melting points (not corrected) were determined using a SGW® X-4 apparatus (Shanghai Precision & Scientific Instrument Co., Ltd., China). Optical rotations were determined on a Perkin-Elmer 341 polarimeter, and CD spectra were obtained on a Jasco 810 spectrometer. UV spectra were recorded on a Shimadzu UV-2550 spectrophotometer. IR spectra were recorded on a Perkin-Elmer 577 spectrometer with KBr disks. NMR spectra were acquired on a Bruker AM-400 spectrometer. The delays for the HMBC and the mixing times for the NOESY spectra, were 1 s and 220 ms, respectively. EIMS and HREIMS (70 eV) were carried out on a Finnigan MAT 95 mass spectrometer. ESIMS and HRESIMS were obtained on an Esquire 3000plus (Bruker Daltonics) and a Waters-Micromass Q-TOF Ultima Global electrospray mass spectrometer, respectively. Silica gel (200-300 mesh) (Qingdao Haiyang Chemical Co. Ltd.), C18 reverse-phased silica gel (150-200 mesh, Merck), MCI gel (CHP20P, 75-150  $\mu$ M, Mitsubishi Chemical Industries Ltd.), and Sephadex LH-20 gel (Amersham Biosciences) were used for column chromatography. All solvents used for chromatography were of analytical grade (Shanghai Chemical Plant, Shanghai, People's Republic of China).

### **Plant Material**

The plant material of *T. chinensis* was collected from Xishuangbanna, People's Republic of China, and was authenticated by Professor You-Kai Xu of Xishuangbanna Tropical Botanical Garden, Chinese Academy of Sciences. A voucher specimen (accession number TCh-2005-2Y) has been deposited in the Shanghai Institute of Materia Medica.

### **Crystal Structure Analysis of trigochinin A (1)**

Crystal data were obtained on a Bruker SMART CCD detector employing graphite

monochromated Mo-K $\alpha$  radiation ( $\lambda = 0.71073 \text{ \AA}$ ) at 293 K and operating in the  $\phi$ - $\omega$  scan mode. The structure was solved by direct methods SHELXS-97 (G. M. Sheldrick, *SHELXS-97: Program for Crystal Structure Resolution*; University of Göttingen: Göttingen, Germany, 1997.) and refined with full-matrix least-squares calculations on  $F^2$  using SHELXL-97 (G. M. Sheldrick, *SHELXL-97: Program for Crystal Structure Refinement*; University of Göttingen: Göttingen, Germany, 1997.). Crystallographic data for trigochinin A (**1**) have been deposited at the Cambridge Crystallographic Data Centre (deposition no. CCDC-729840). Copies of these data can be obtained free of charge via [www.ccdc.cam.ac.uk/conts/retrieving.html](http://www.ccdc.cam.ac.uk/conts/retrieving.html) or from the Cambridge Crystallographic Data Centre, 12, Union Road, Cambridge CB21EZ, UK. [fax: (+44) 1223-336-033; or email: [deposit@ccdc.cam.ac.uk](mailto:deposit@ccdc.cam.ac.uk)].

S5.  $^1\text{H}$  NMR spectrum of trigochinin A (1)

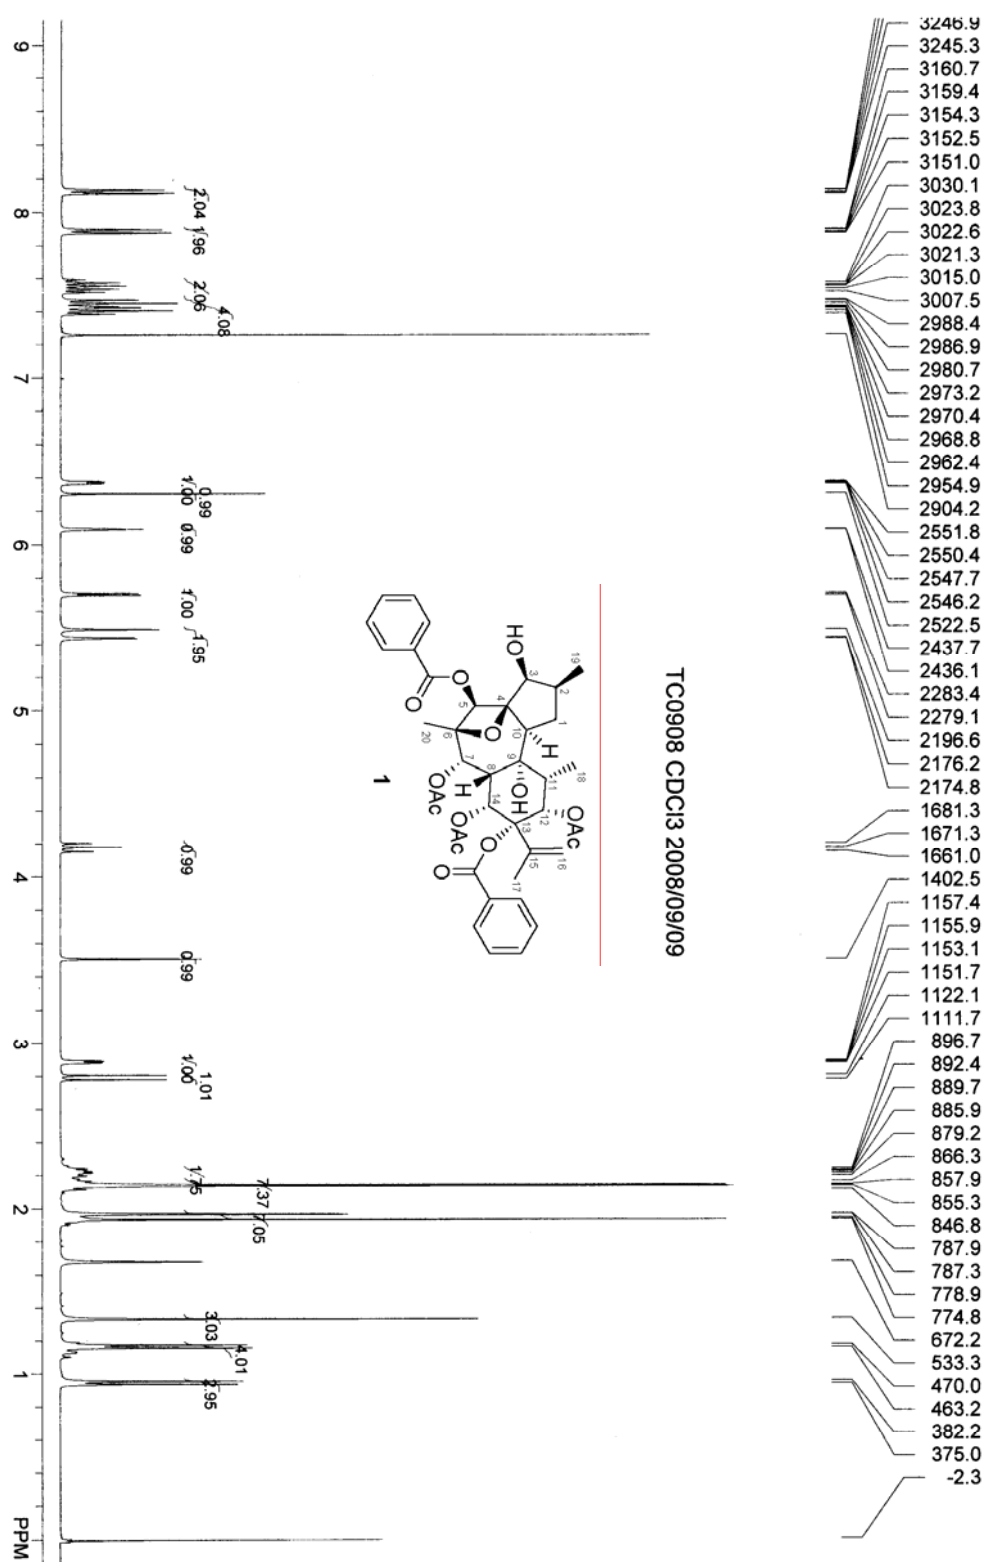



S6.  $^{13}\text{C}$  NMR spectrum of trigochinin A (1)

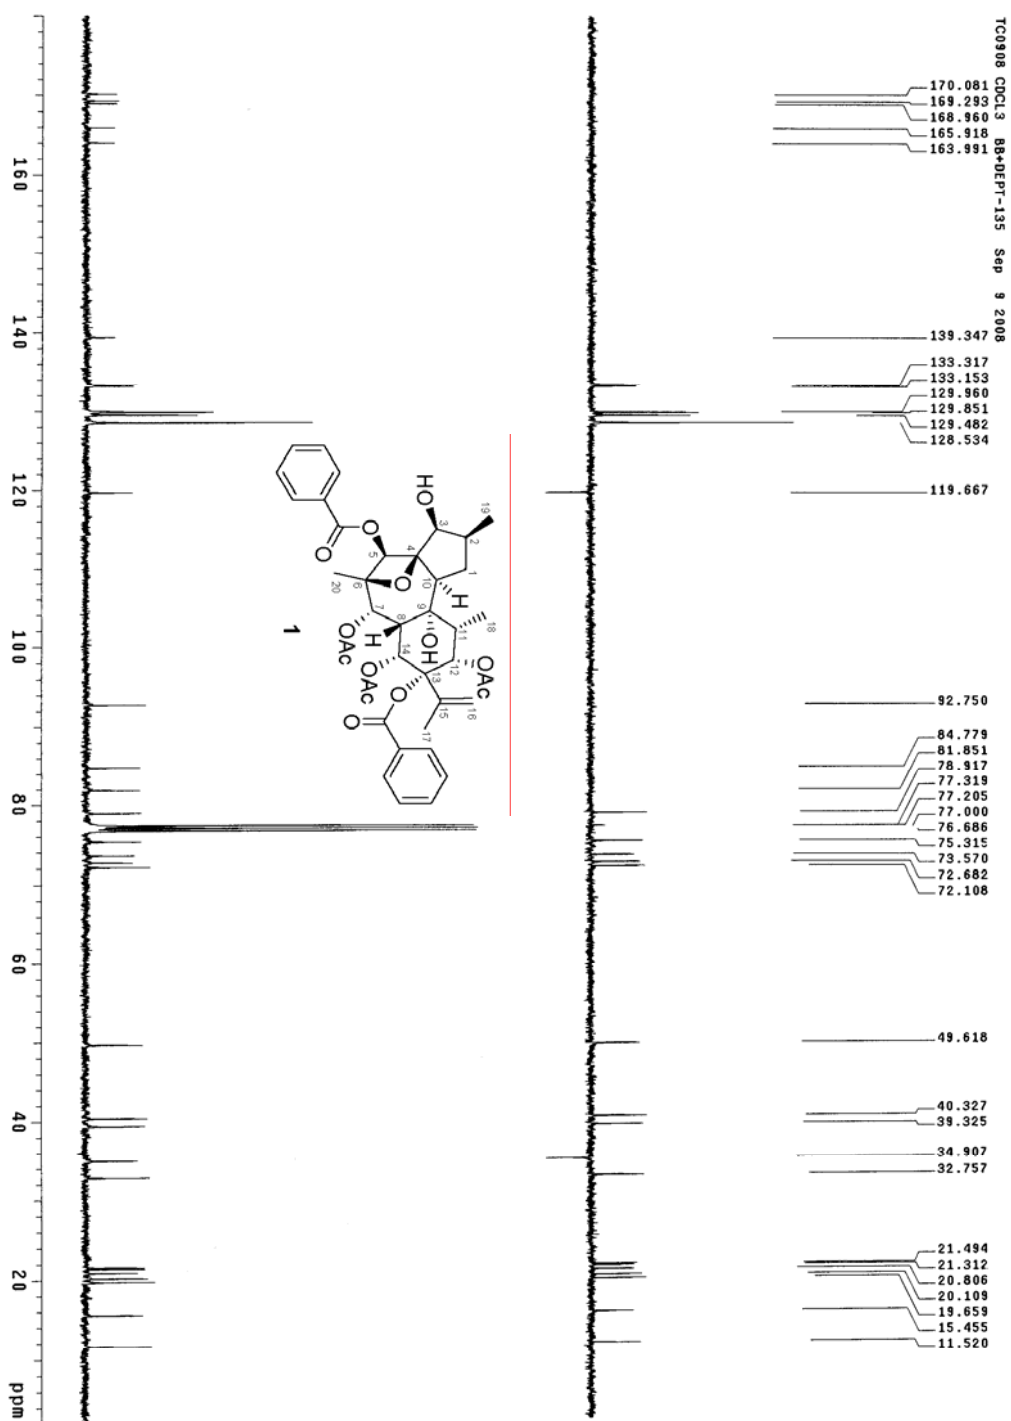

# S7. EIMS of trigochinin A (1)

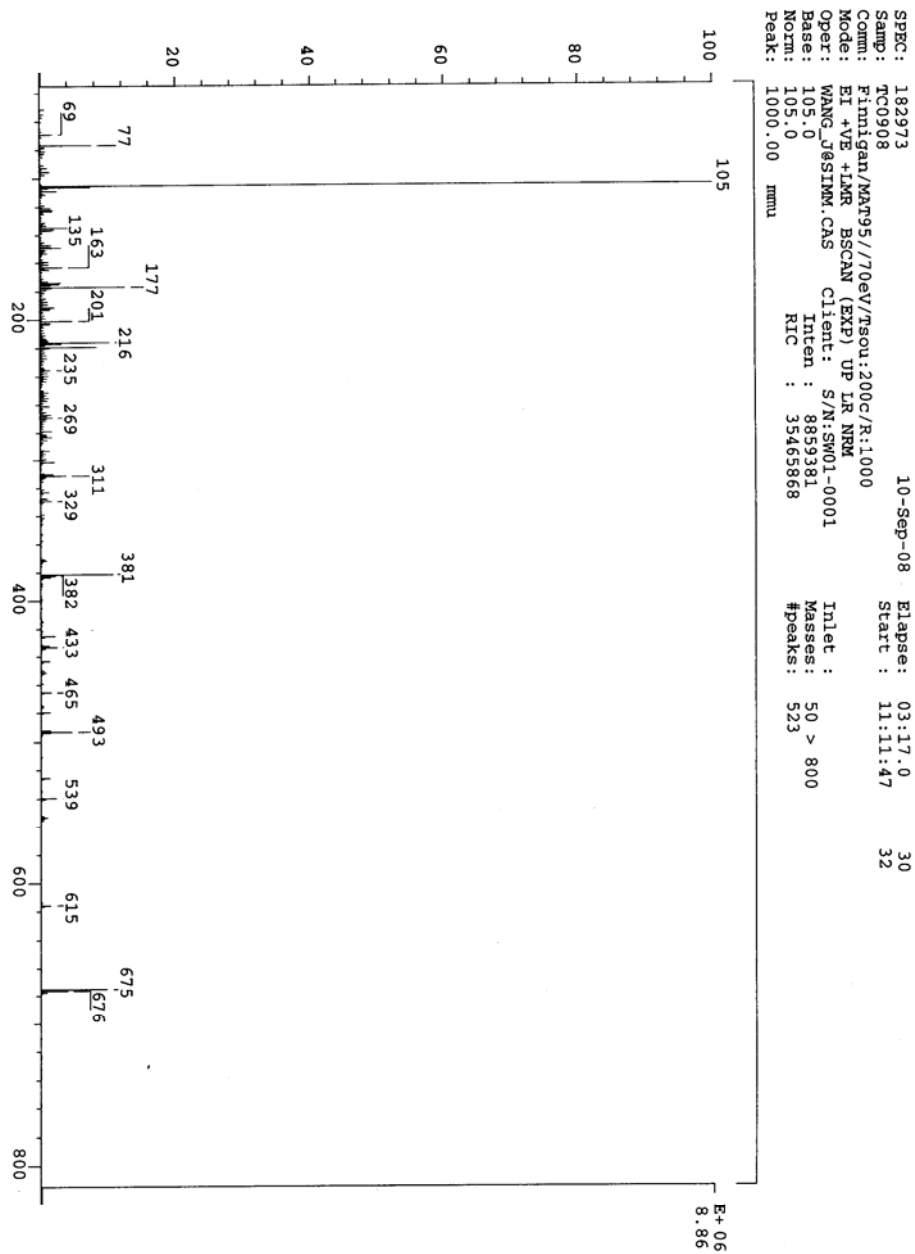

**S8. HSQC spectrum of trigochinin A (1)**

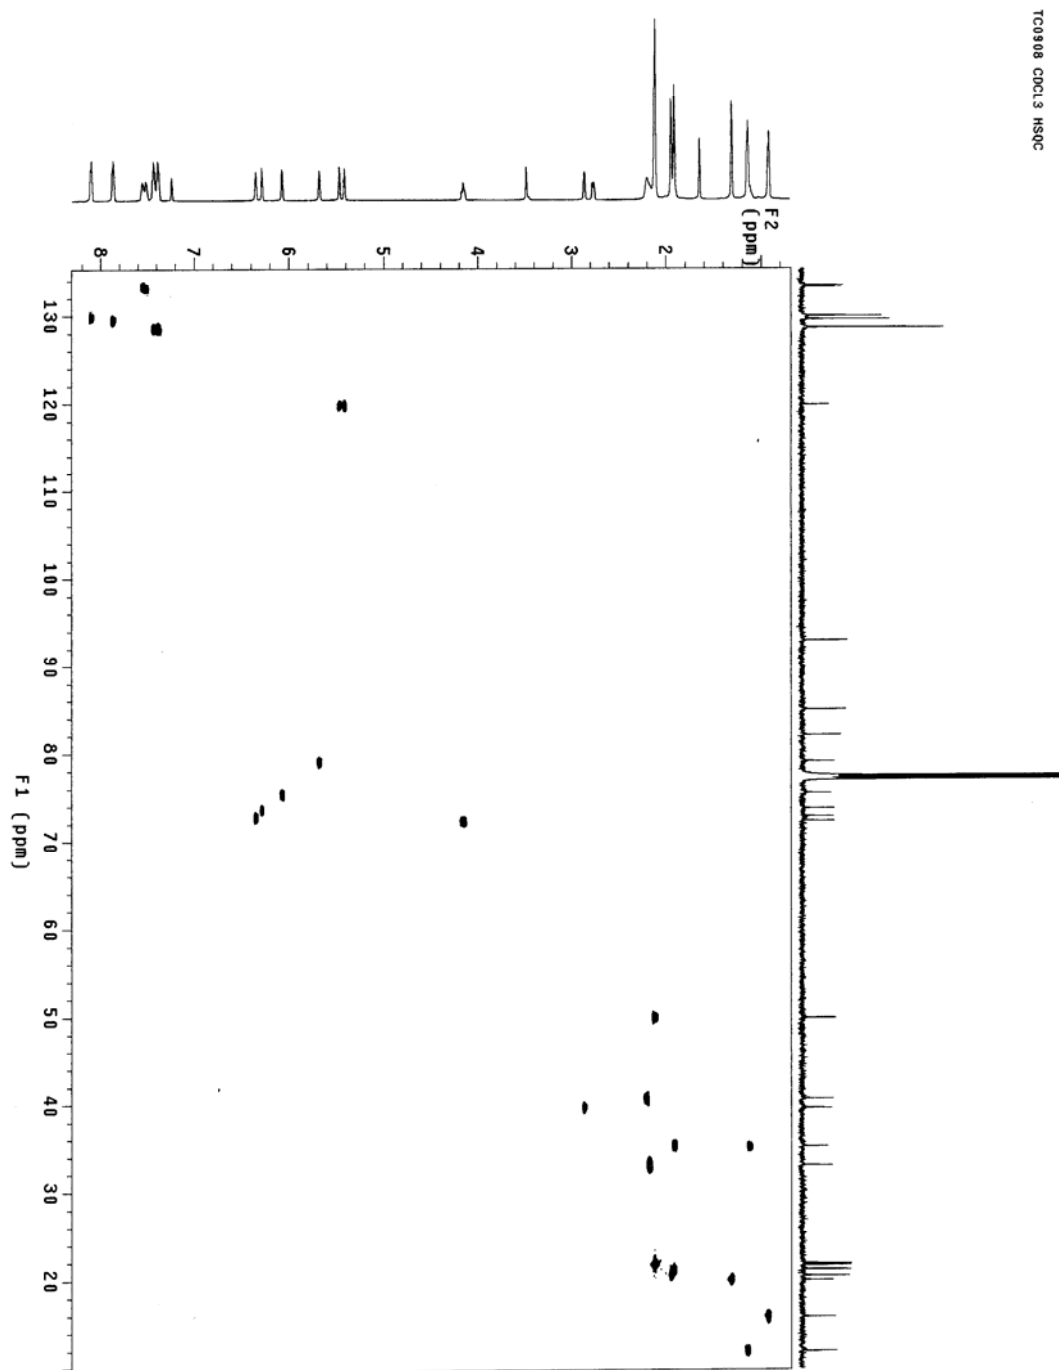

## S9. HMBC Spectrum of trigochinin A (1)

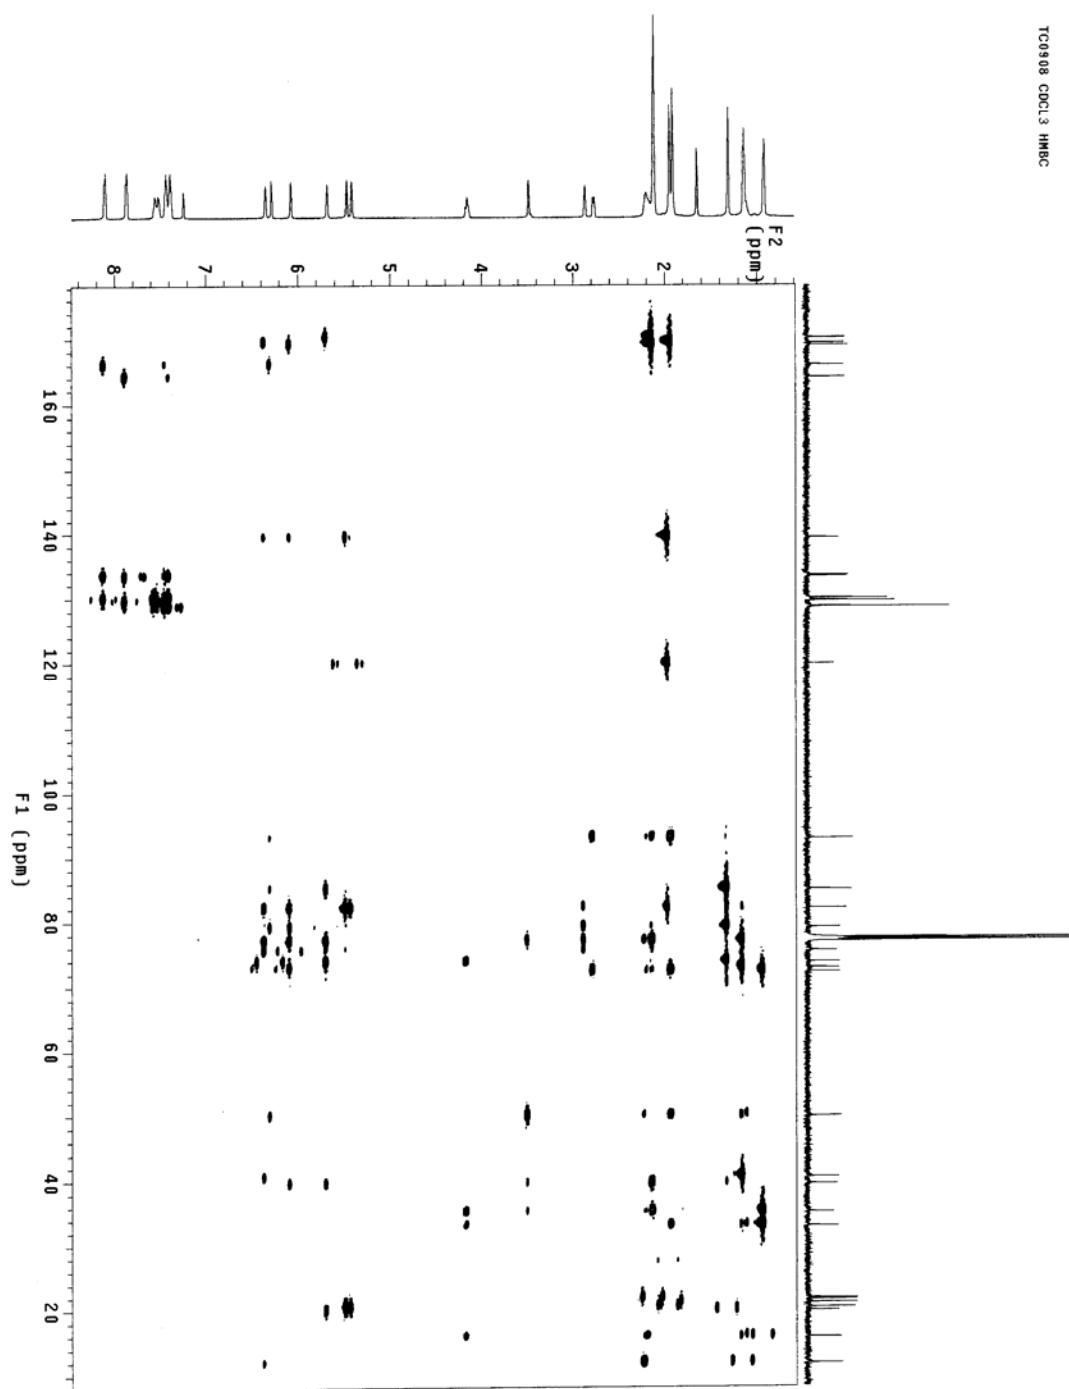

# **S10. ROESY spectrum of trigochinin A (1)**

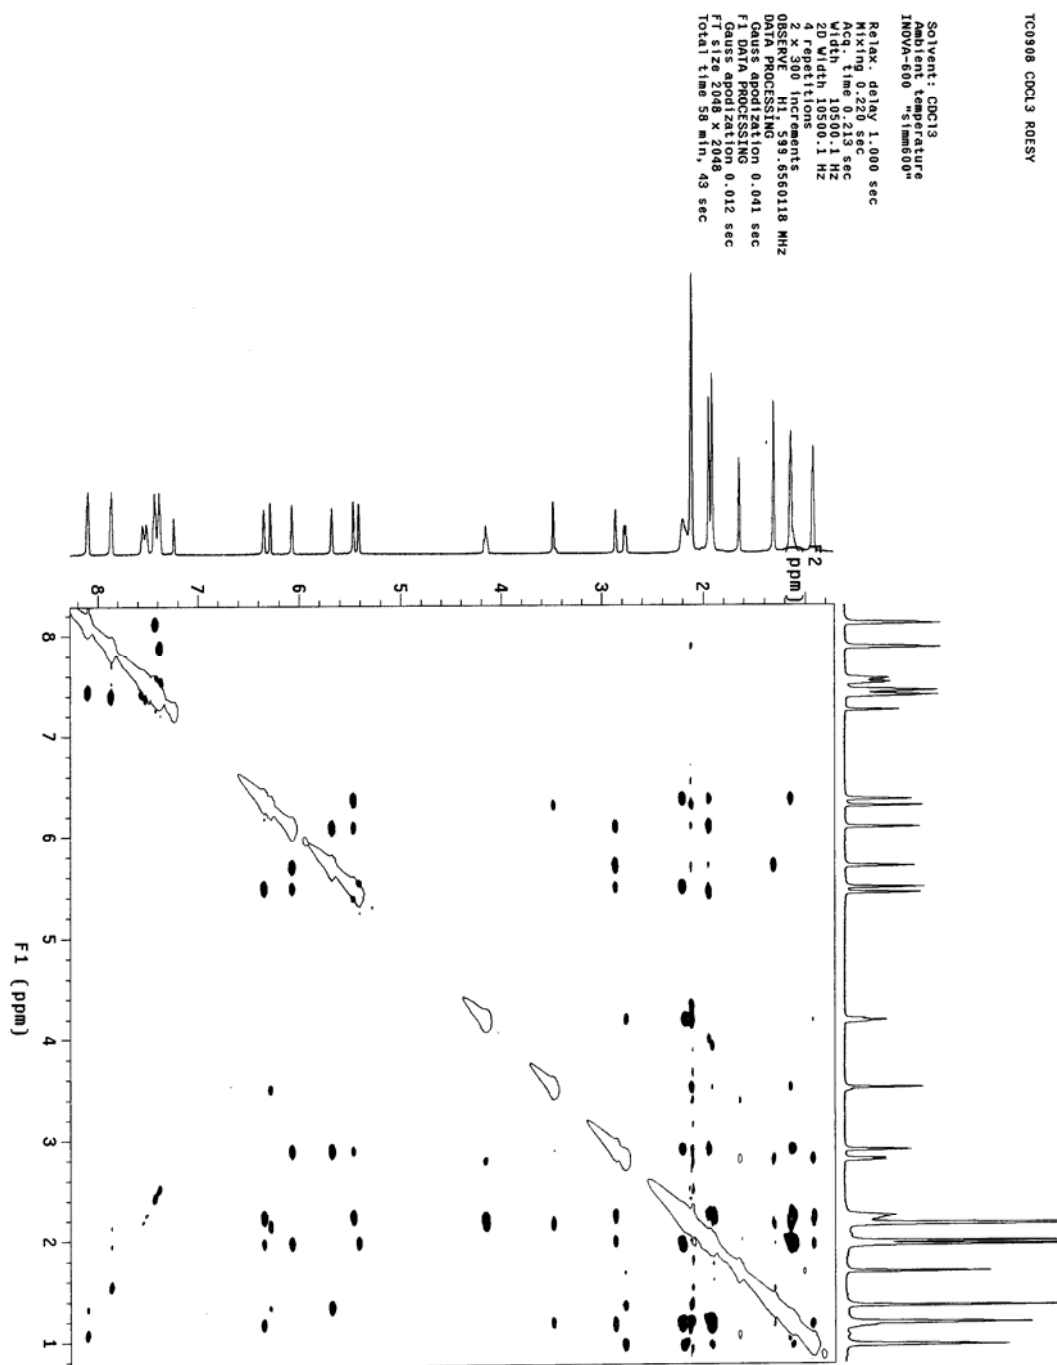

**S11. <sup>1</sup>H NMR spectrum of trigochinin B (2)**

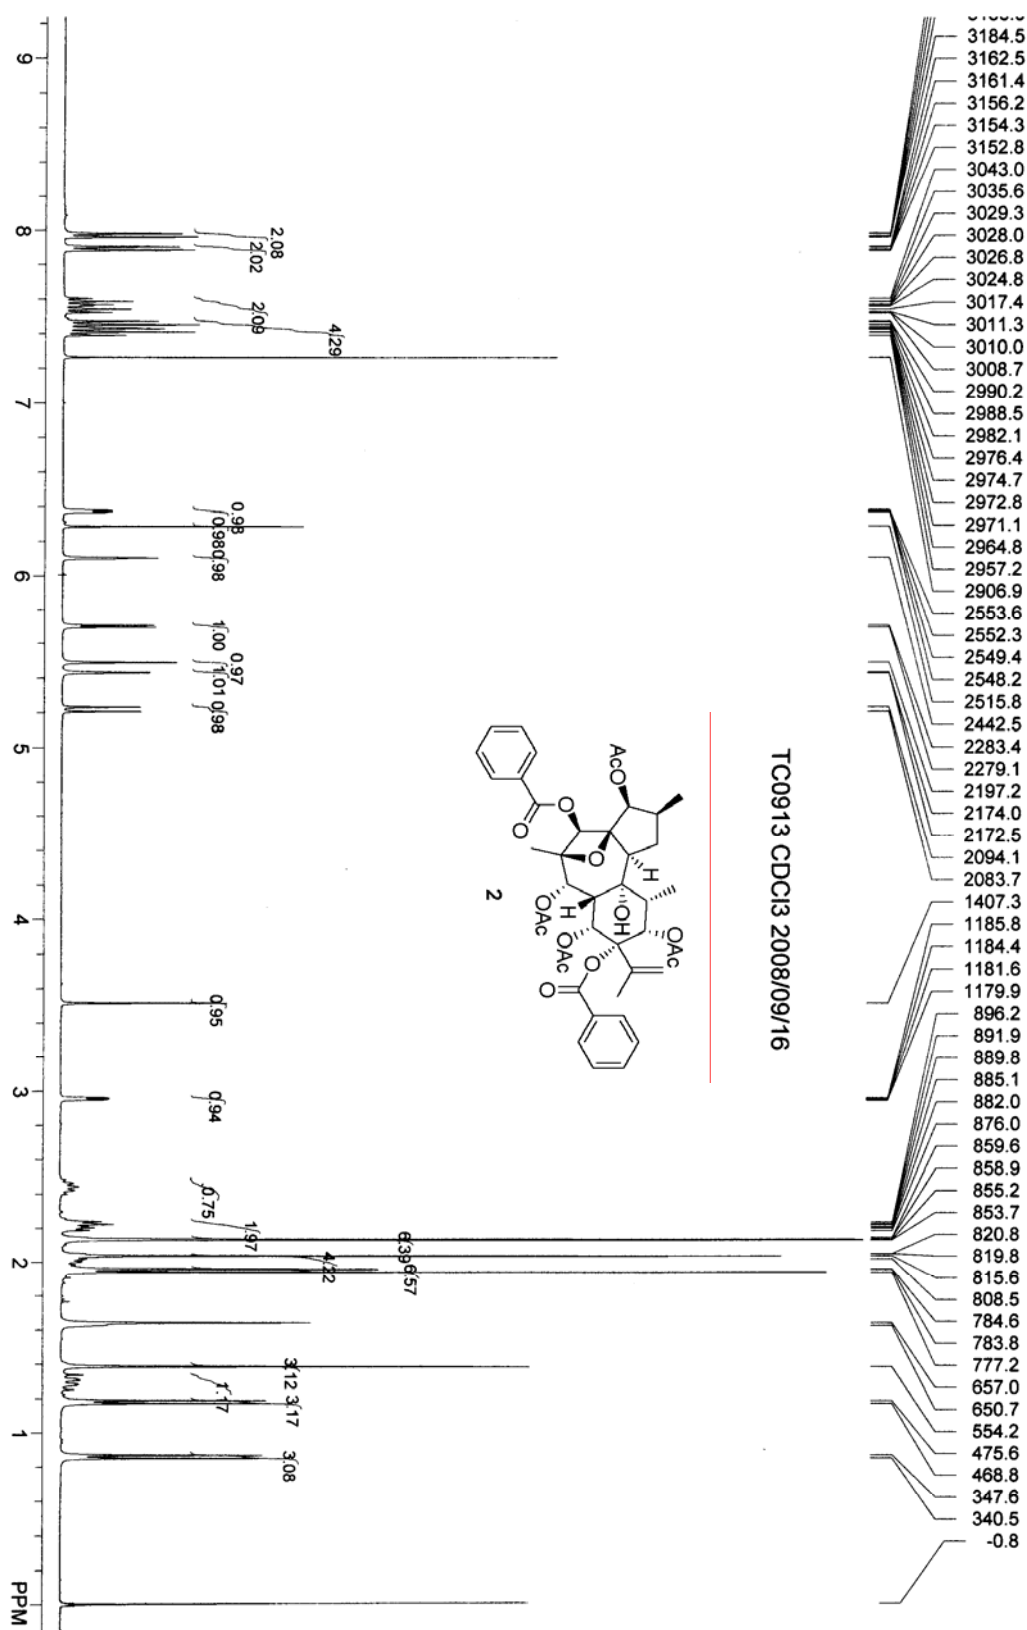

S12.  $^{13}\text{C}$  NMR spectrum of trigochinin B (2)

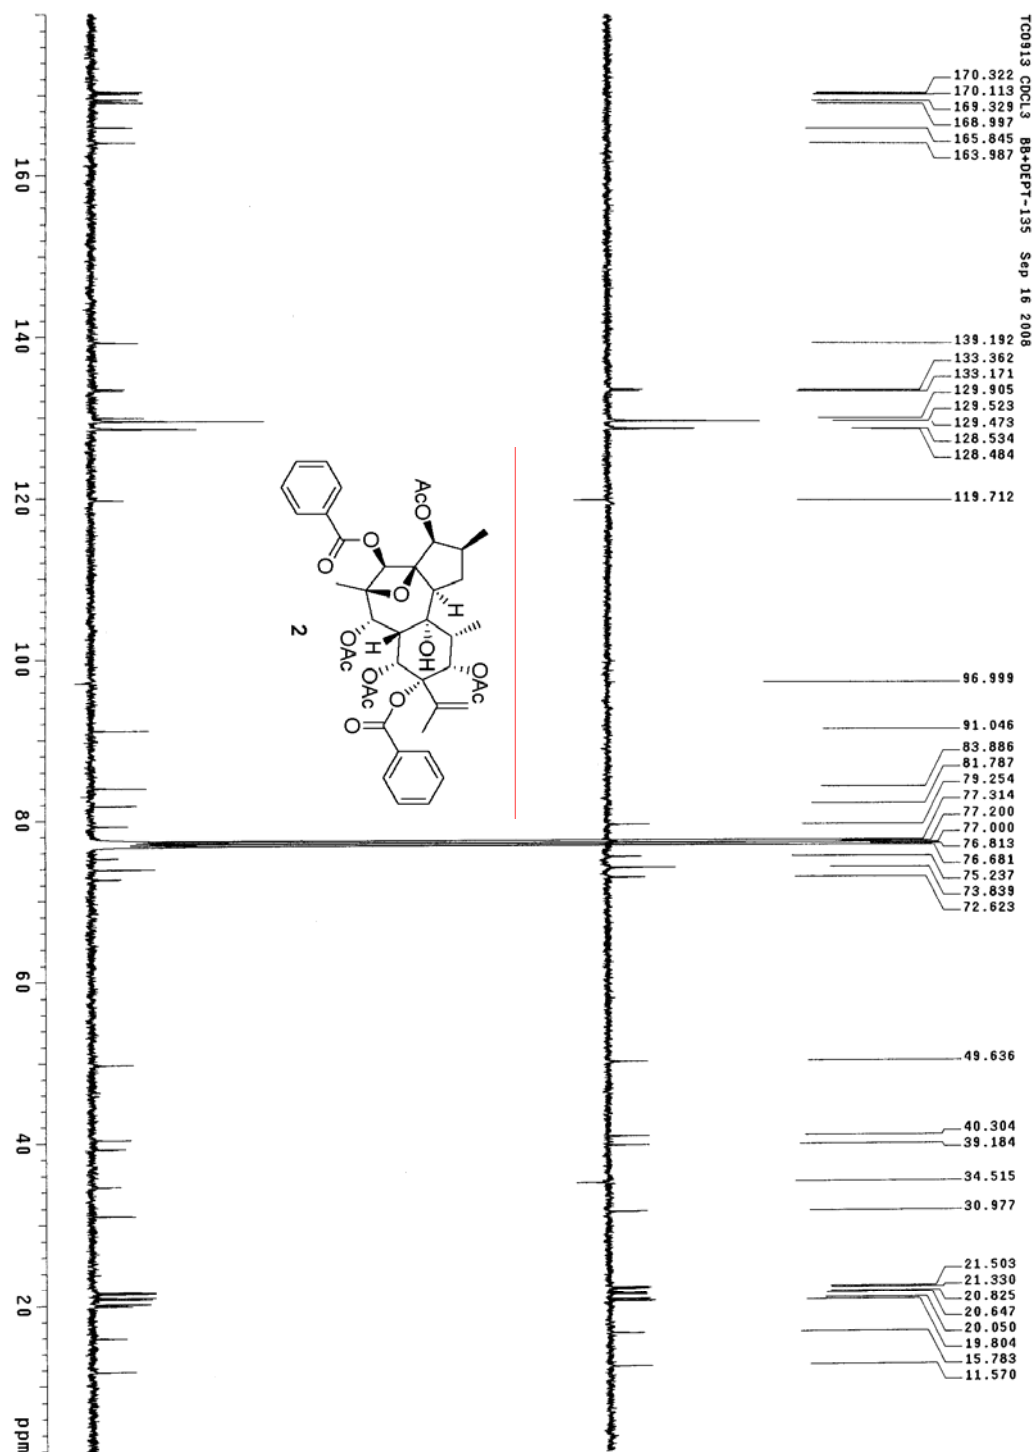

# S13.EIMS of trigochinin B (2)

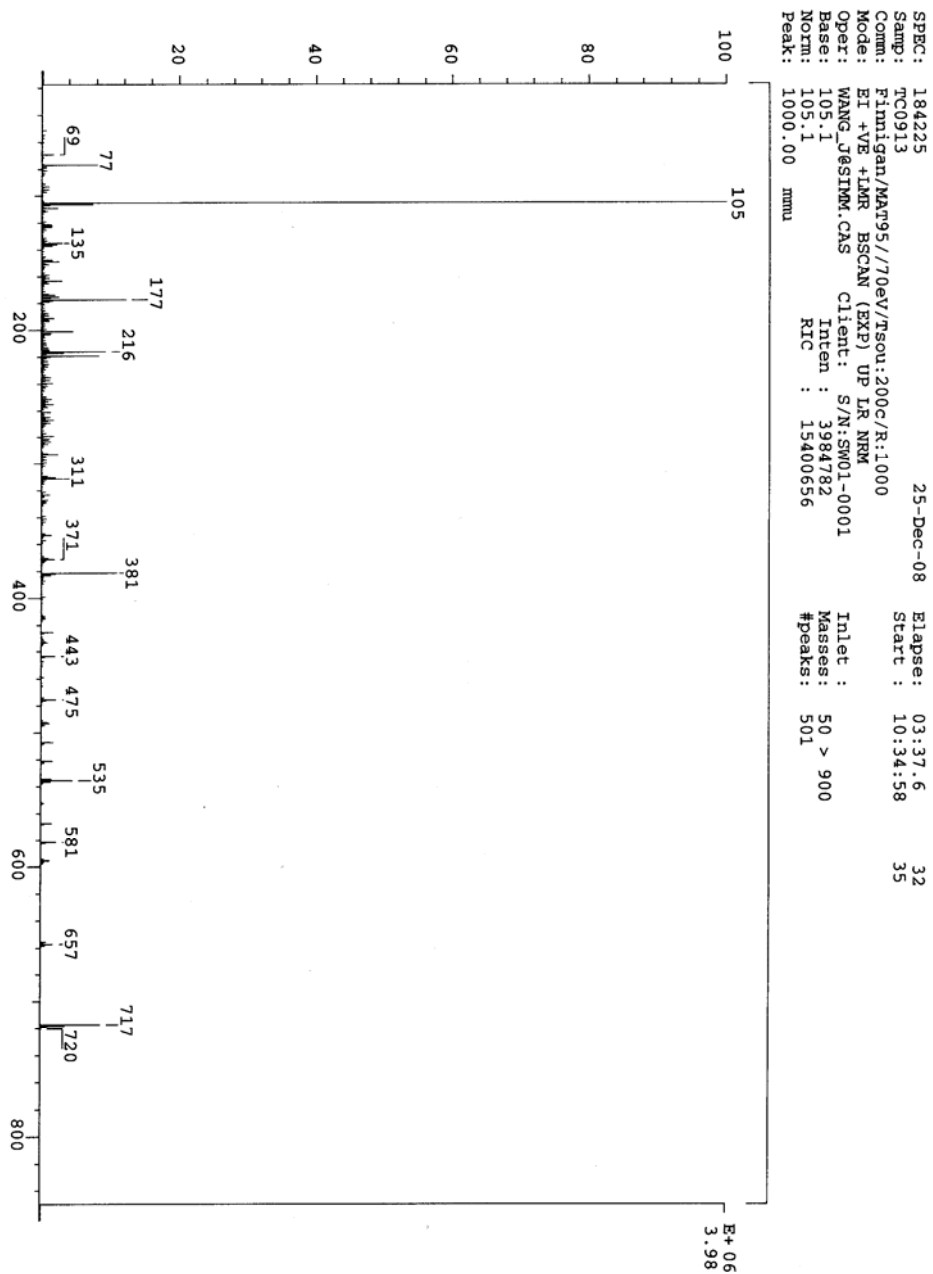



# S14. HSQC spectrum of trigochinin B (2)

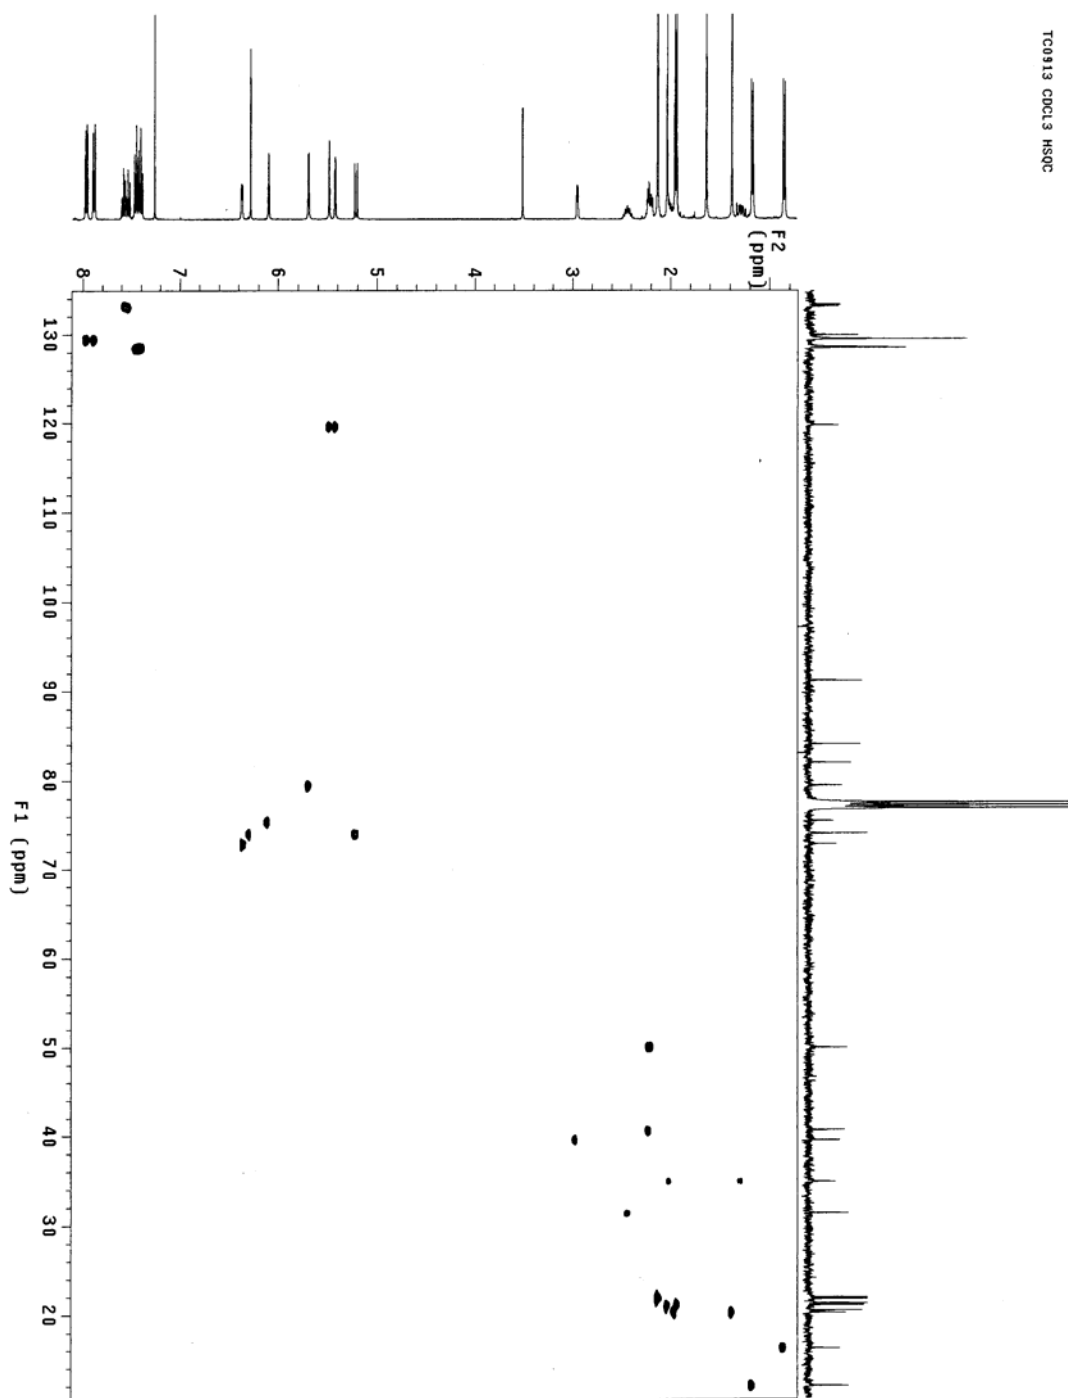

**S15. HMBC spectrum of trigochinin B (2)**

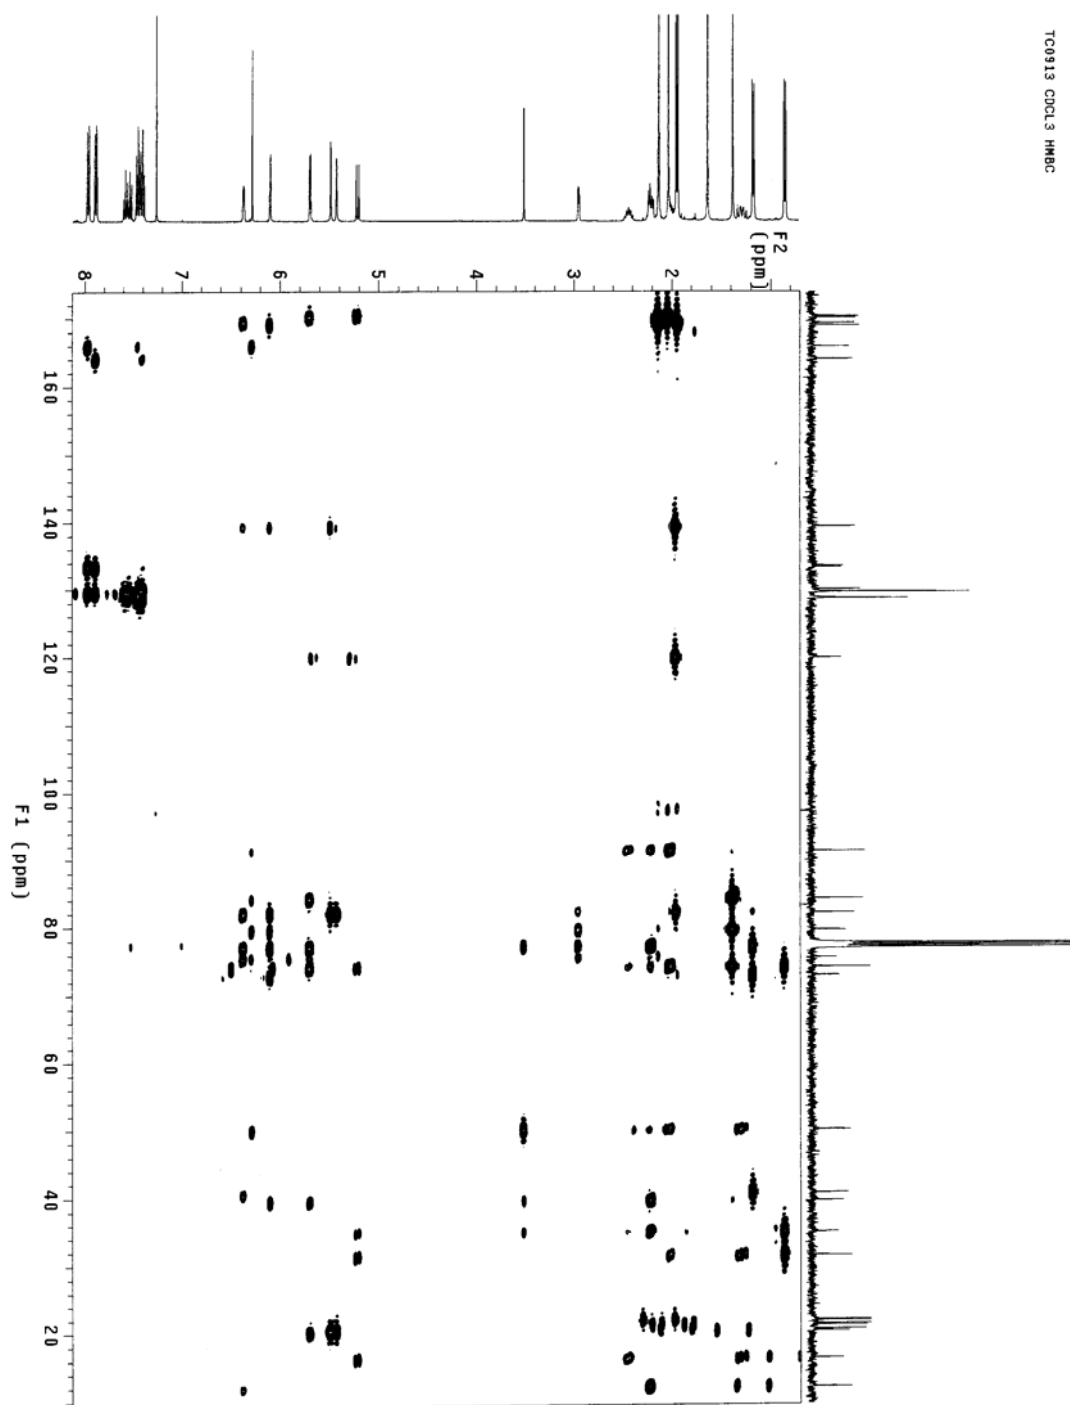

# **S16. ROESY spectrum of trigochinin B (2)**

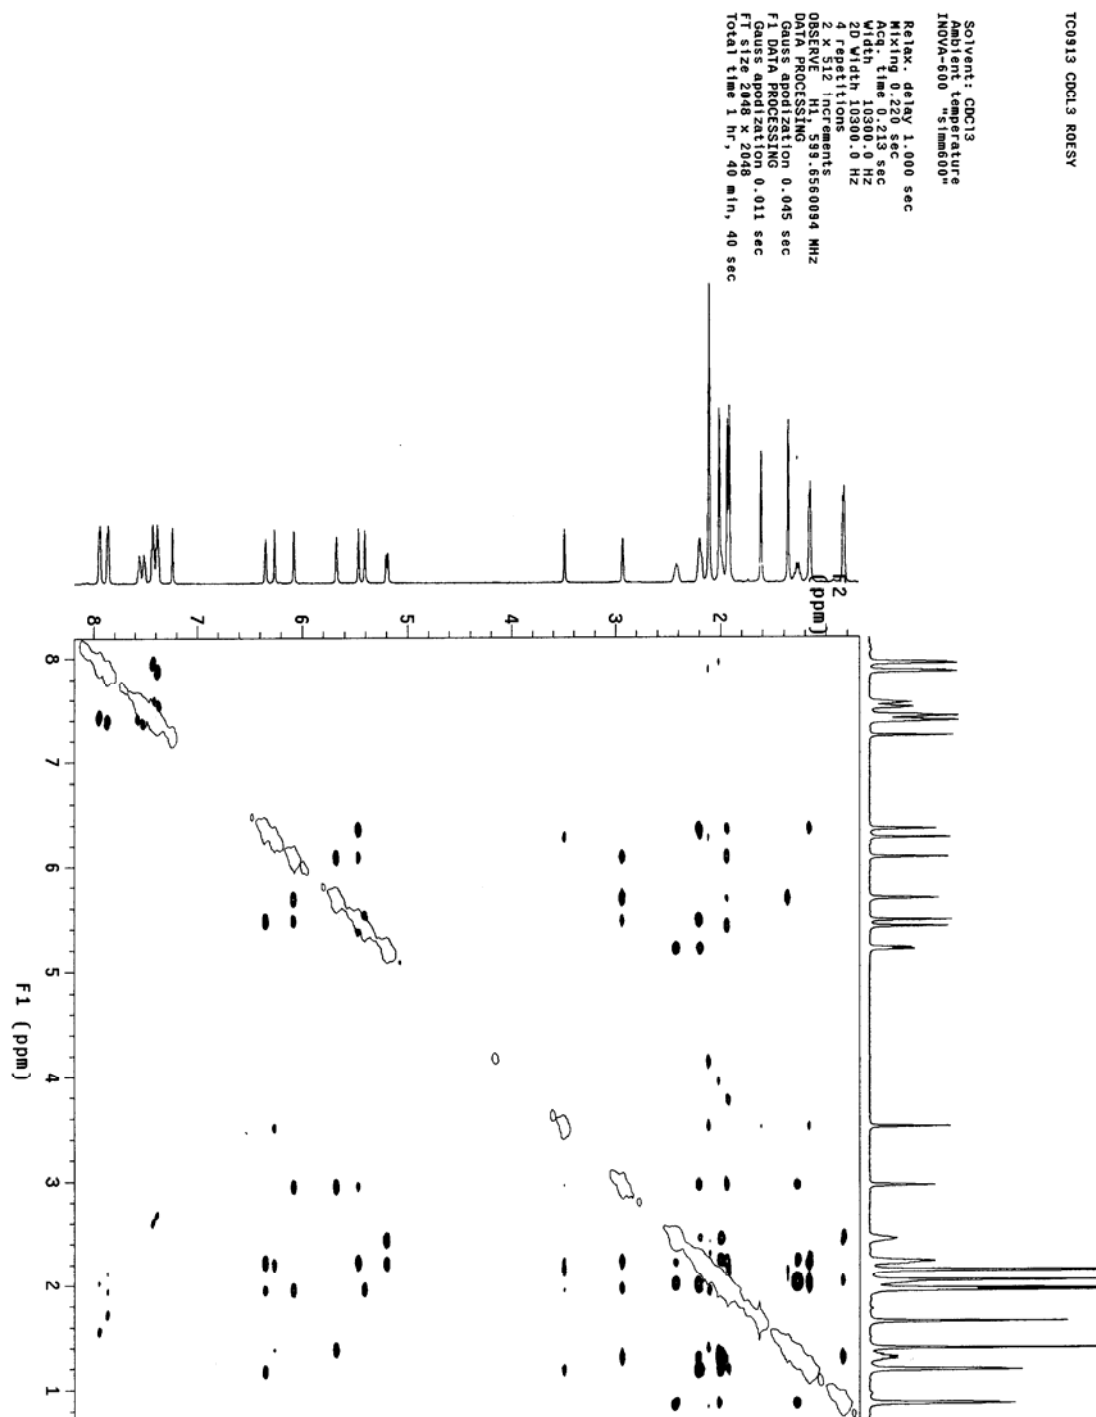

S17.  $^1\text{H}$  NMR spectrum of trigochinin C (3)

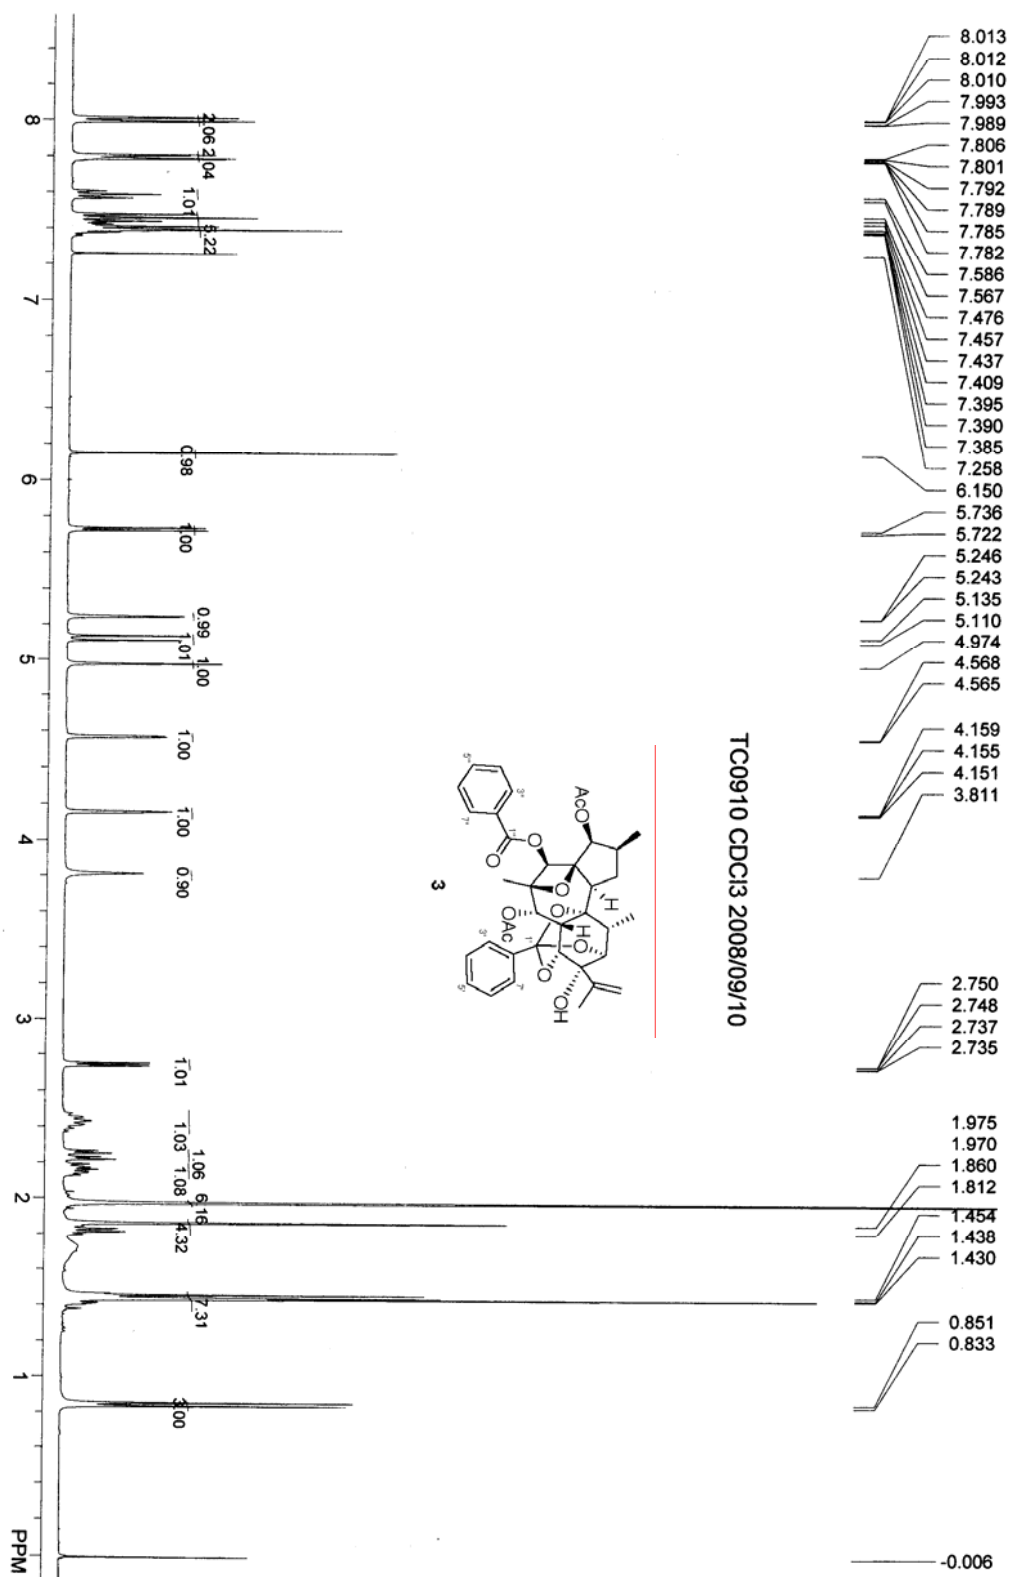

S18.  $^{13}\text{C}$  NMR spectrum of trigochinin C (3)

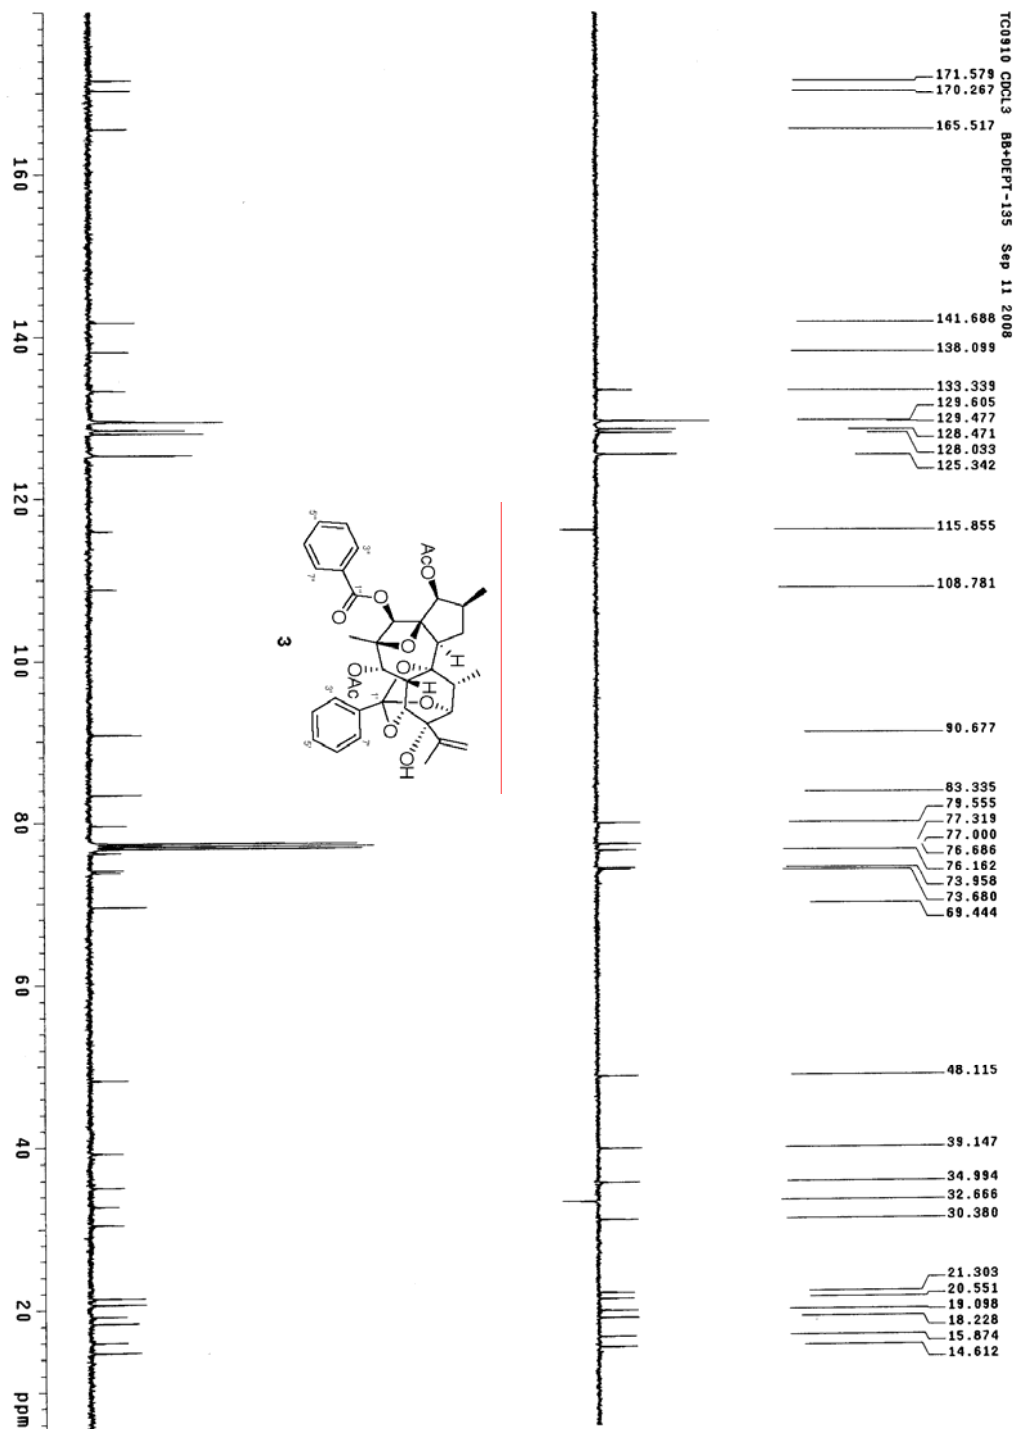

# S19. EIMS of trigochinin C (3)

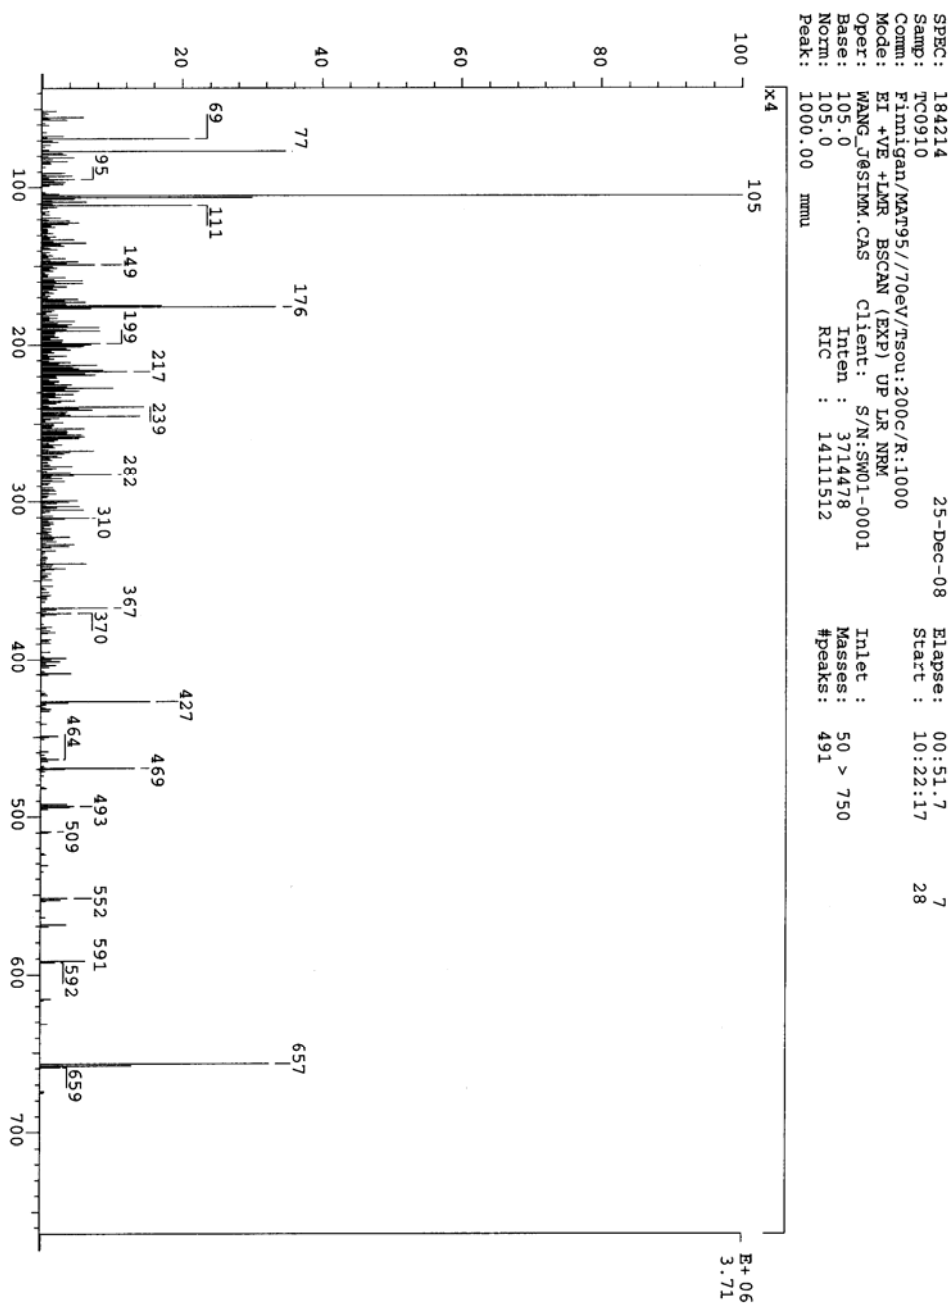

## S20. HSQC spectrum of trigochinin C (3)

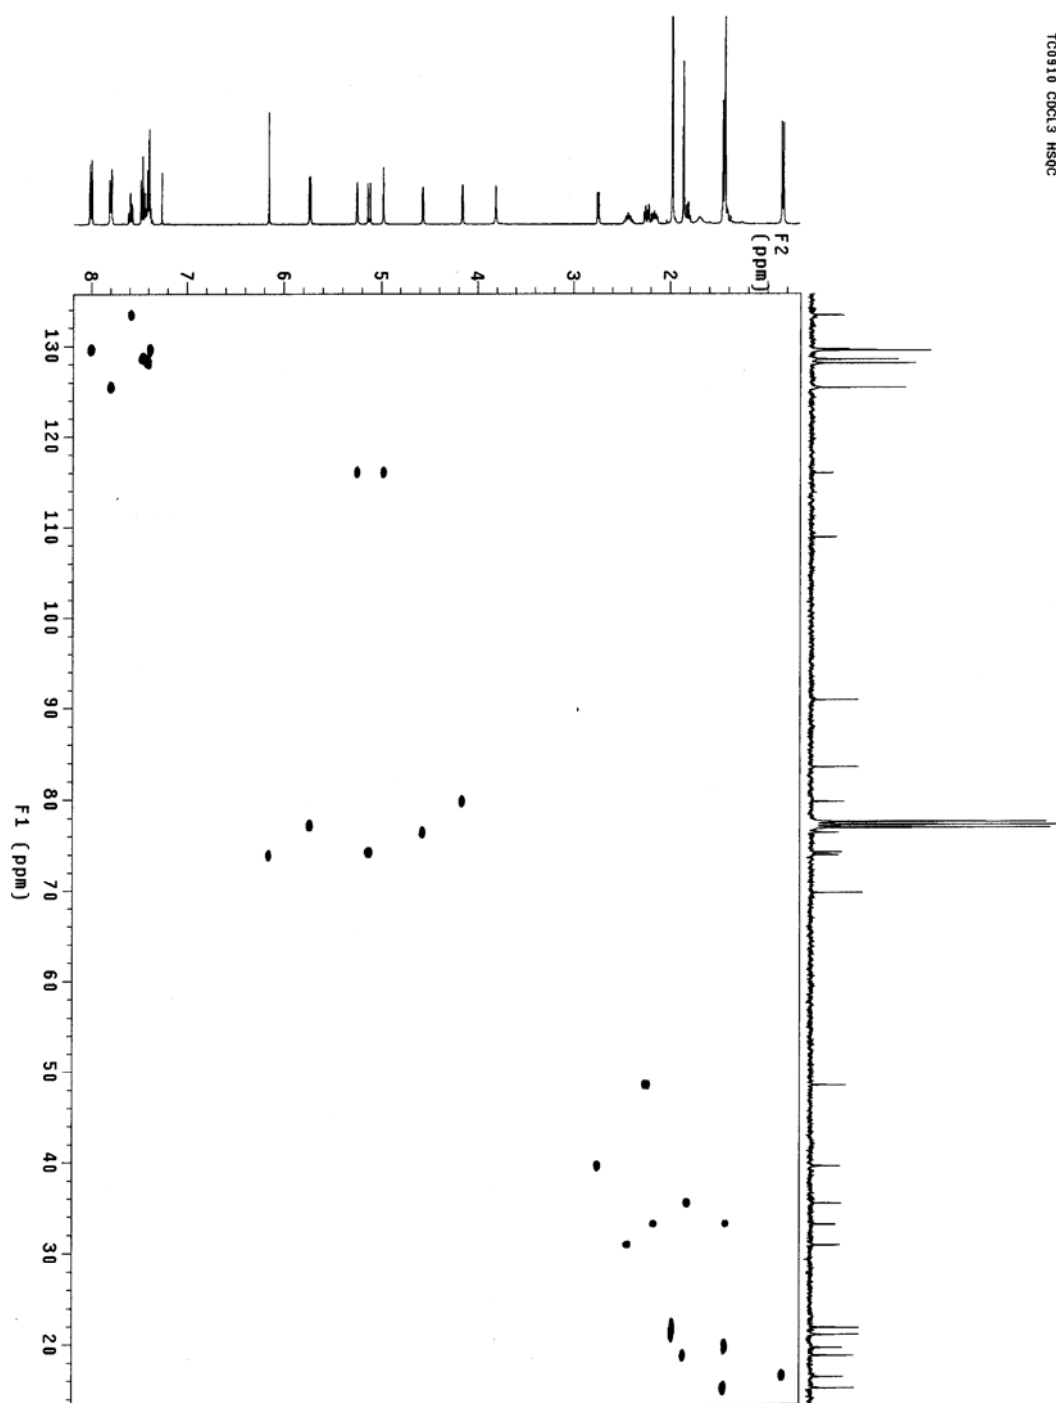

**S21. HMBC spectrum of trigochinin C (3)**

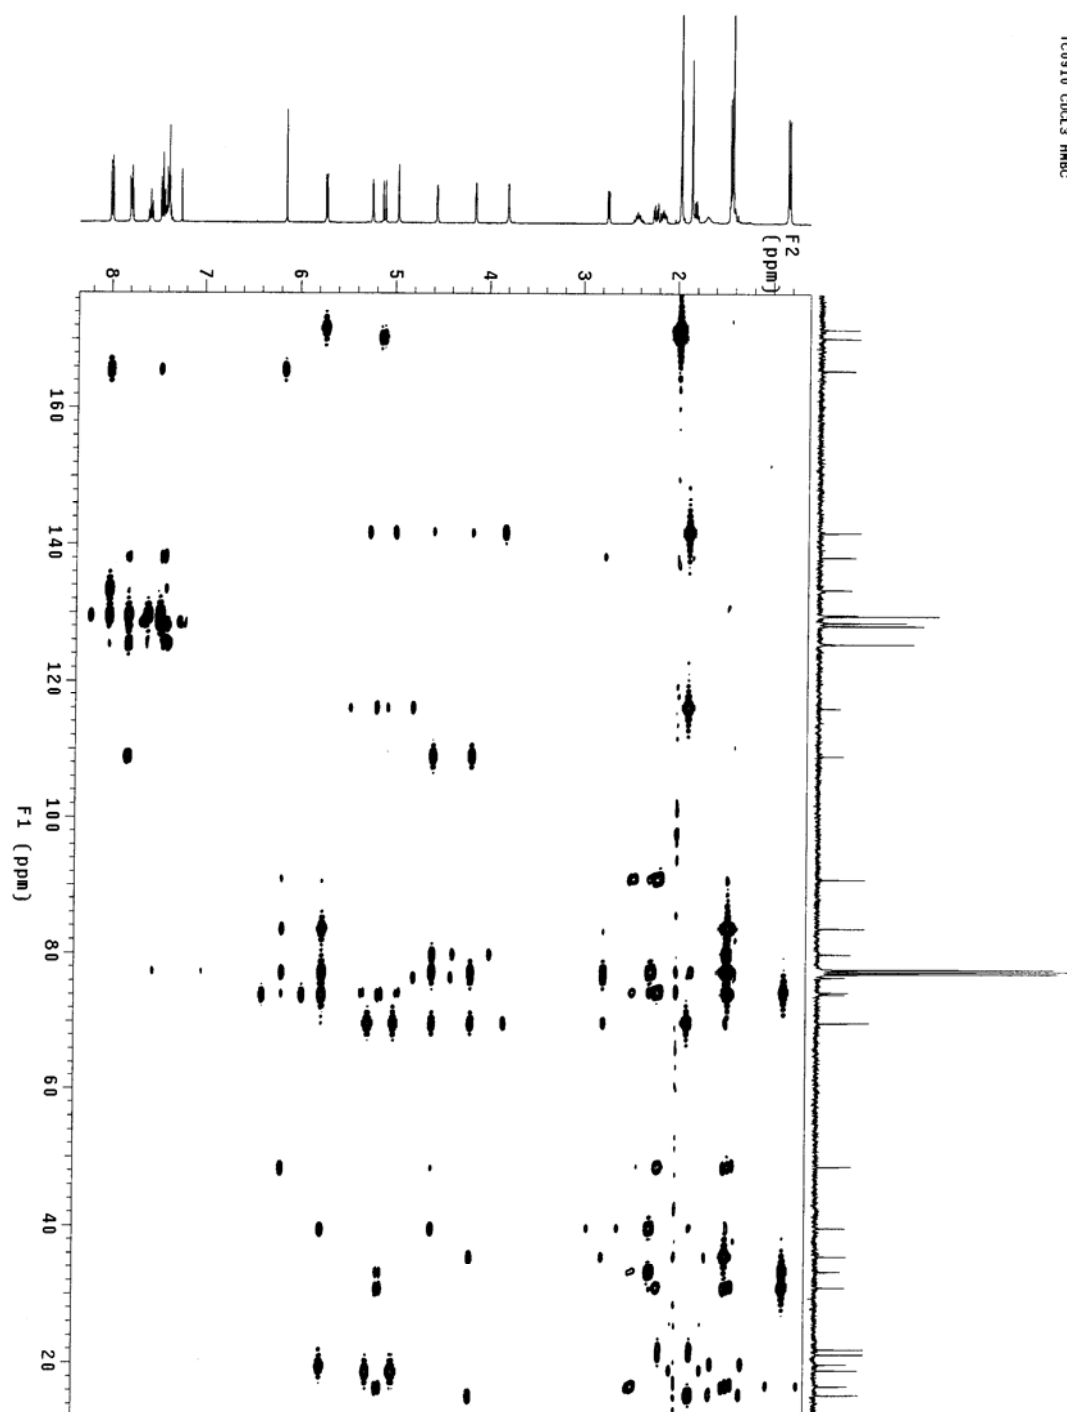



## S22. ROESY spectrum of trigochinin C (3)

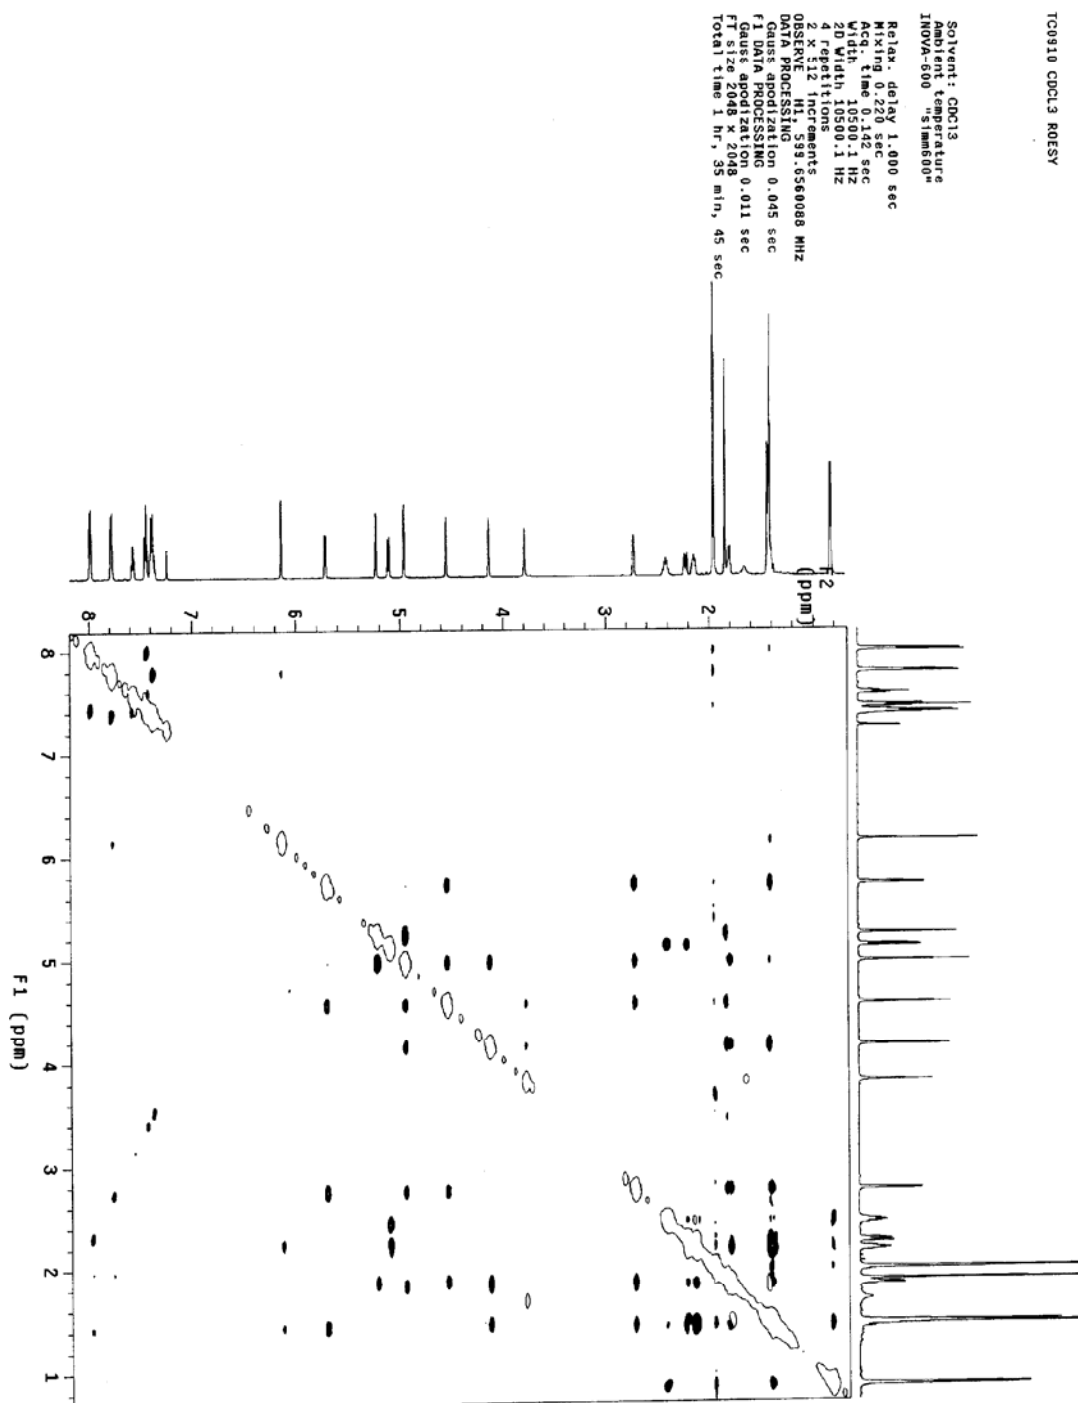

Supplement: Supplementary file 1 [file 4477810]
